# Supplementary material for: The c-Jun/RHOB/AKT pathway confers resistance of BRAF-mutant melanoma cells to MAPK inhibitors
Source: PubMed Central journal article supplement (PMC4558149; doi:10.18632/oncotarget.3888), 2015-05-07
Supplement: oncotarget-06-15250-s001.pdf [file oncotarget-06-15250-s001.pdf]

## SUPPLEMENTARY FIGURES AND TABLES

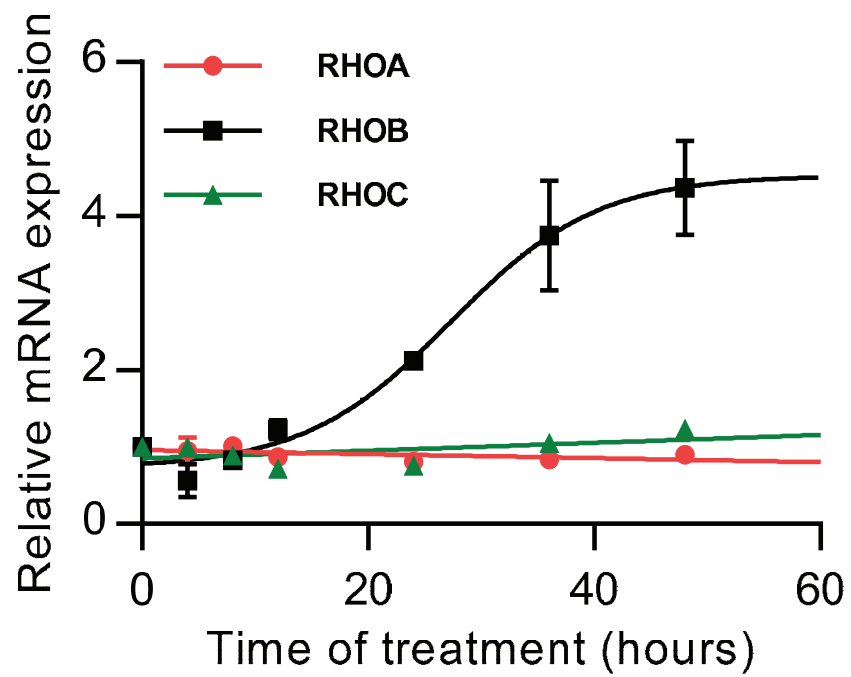

**Supplementary Figure S1: PLX4032 increases RHOB mRNA levels.** RHOA, RHOB and RHOC mRNA levels were assayed by RT-qPCR in response to 1  $\mu$ M PLX4032 for the indicated times in WM266-4 cells.

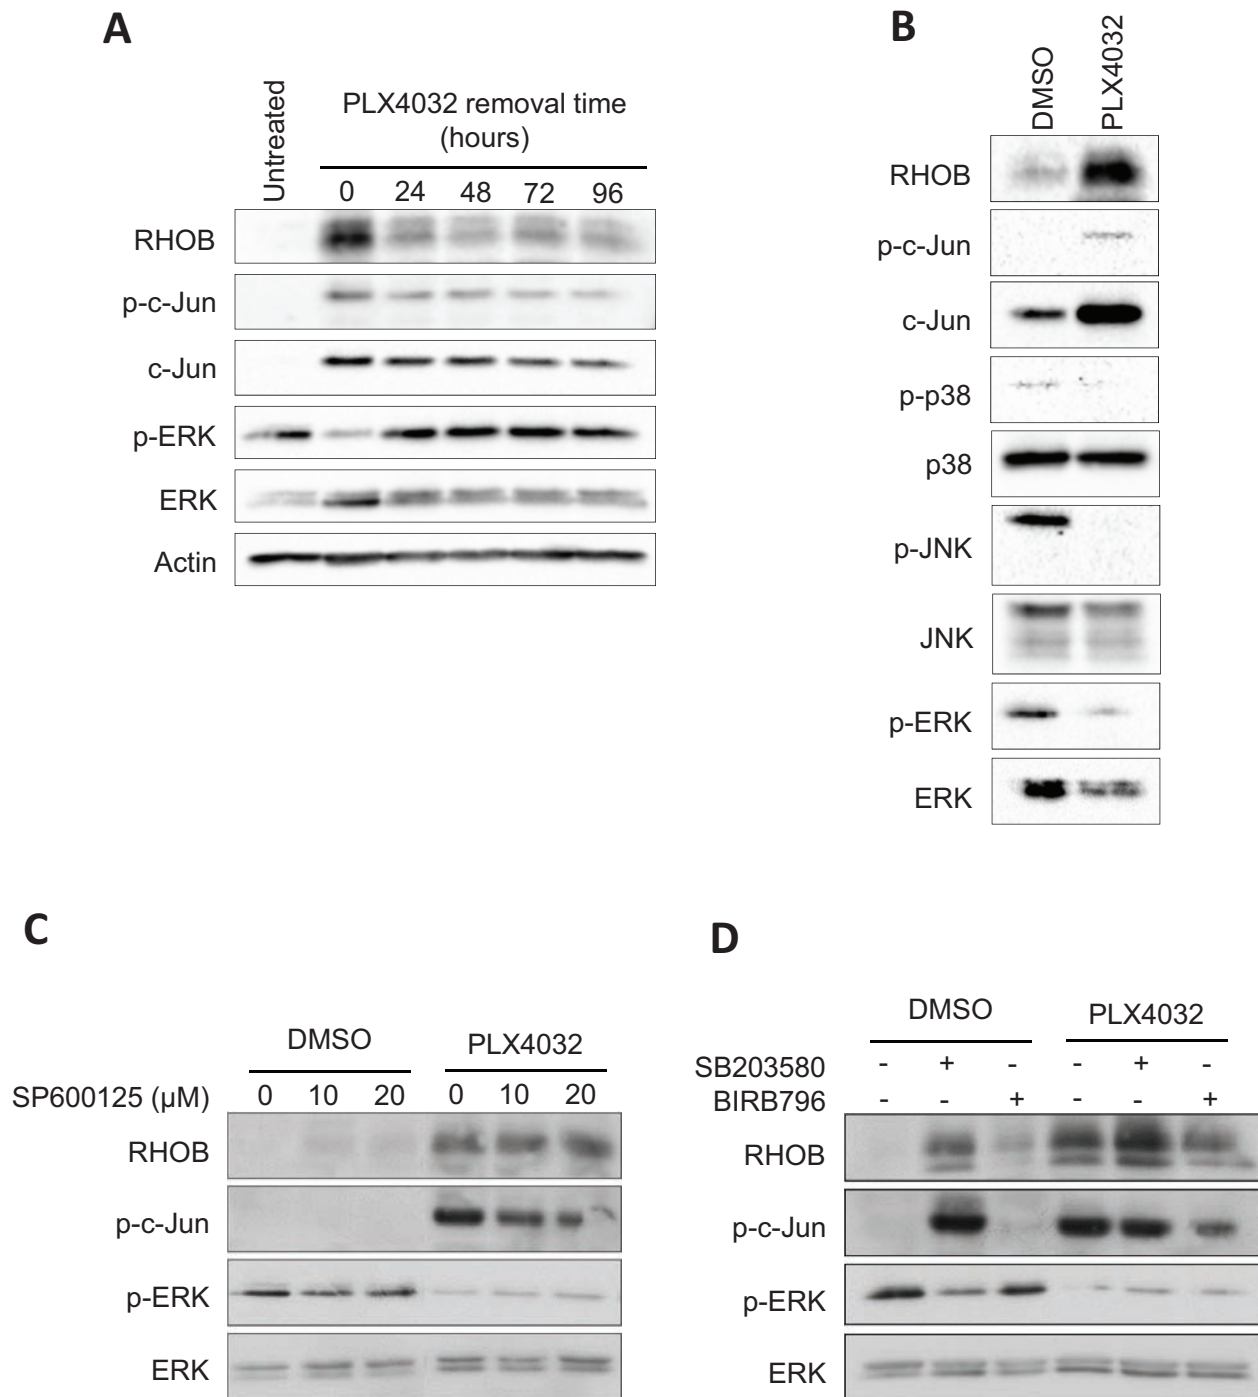

**Supplementary Figure S2: PLX4032 induces long lasting activation and expression of c-Jun independently of JNK and p38.** **A.** WM266-4 cells were treated with 1  $\mu$ M PLX4032 for 48 h, then washed and cultured in PLX4032-free medium for the indicated times. RHOB, c-Jun and p-c-Jun S63 were analyzed by Western blotting, actin was the loading control. **B.** Western blotting analysis of p38, p-p38 T180/Y182, JNK, c-Jun, p-c-Jun S63, ERK and p-ERK T202/Y204 in WM266-4 cells treated with 1  $\mu$ M PLX4032 for 48 h. **C.** Western blotting analysis of c-Jun, p-c-Jun S63 in WM266-4 cells treated for 48 h with the JNK inhibitor, SP600125, either alone or in combination with PLX4032 (1  $\mu$ M). **D.** Western blotting analysis of RHOB, p-c-Jun S63, ERK and p-ERK T202/Y204 in WM266-4 cells co-treated for 48 h with the p38 inhibitor, SB203580 (20  $\mu$ M) or BIRB796 (40  $\mu$ M), and PLX4032 (1  $\mu$ M).

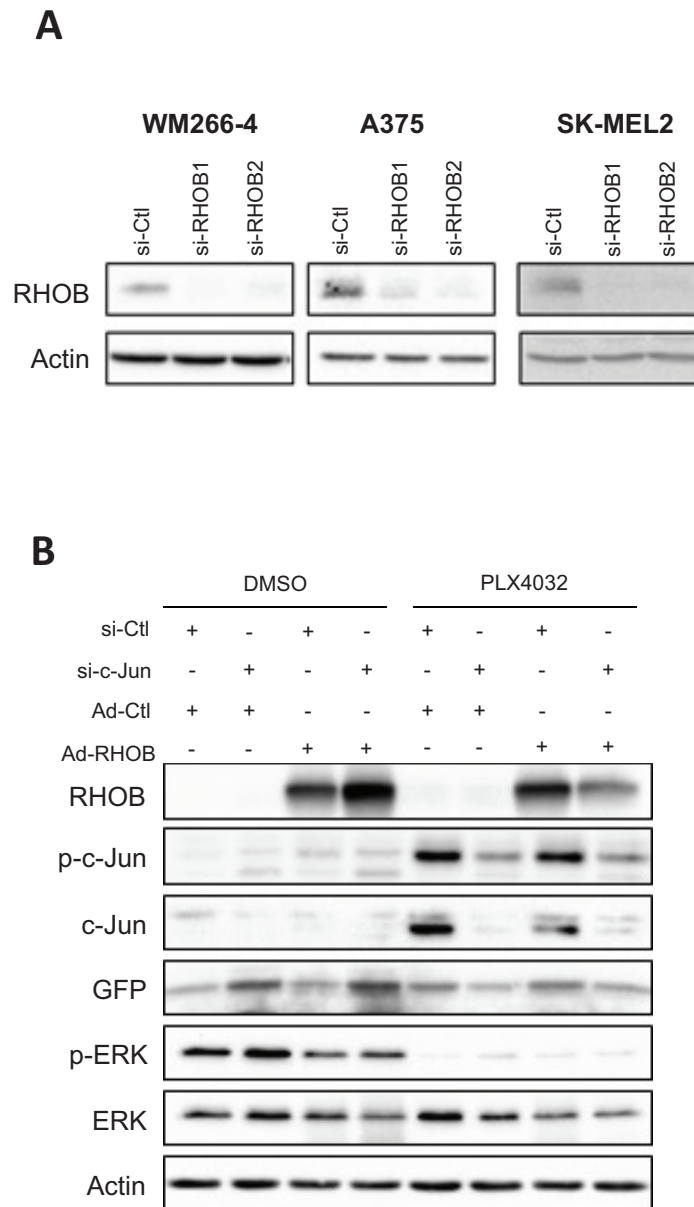

**Supplementary Figure S3: Efficiency of RHOB and c-Jun silencing and of RHOB overexpression.** **A.** Western blotting analysis of RHOB in WM266-4, A375 and SK-MEL2 cells transfected with RHOB-targeting (si-RHOB1 and si-RHOB2) or non-targeting (si-Ctl) siRNAs for 72 h. Actin was the loading control. **B.** Western blotting of the indicated proteins in WM266-4 transfected with c-Jun-targeting (si-c-Jun) or non-targeting (si-Ctl) siRNAs for 6 h and then transduced overnight with an adenovirus control (Ad-Ctl) or encoding RHOB (Ad-RHOB) before treatment with 1  $\mu$ M PLX4032 for 72 h.

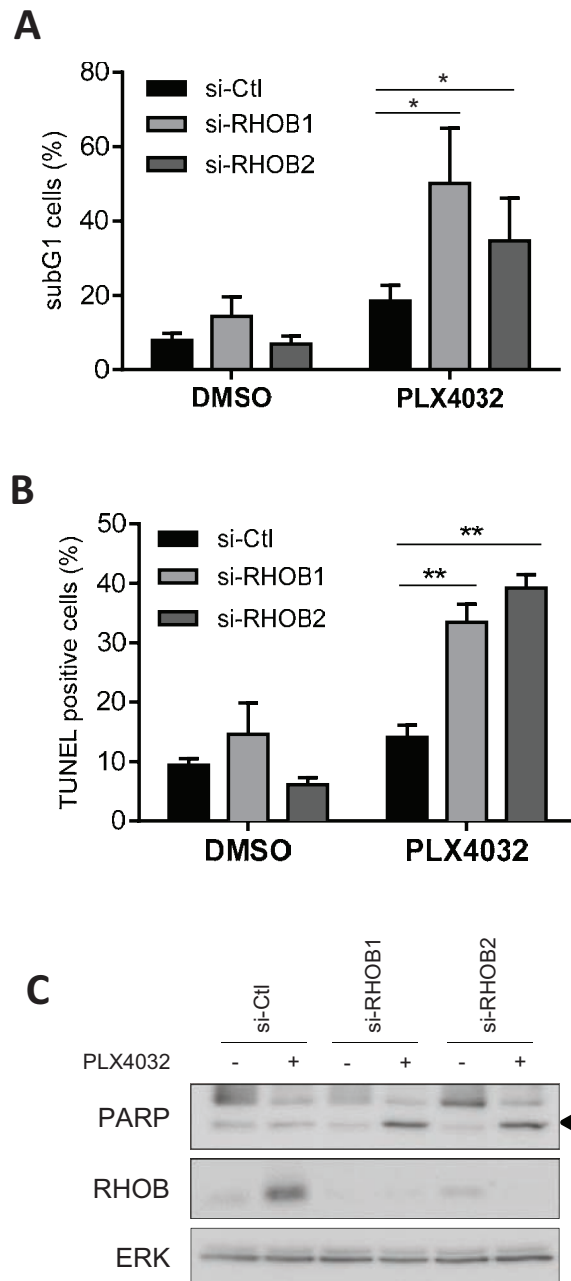

**Supplementary Figure S4: Inhibition of RHOB sensitizes A375 cells to PLX4032-induced apoptosis.** A375 cells were transfected with siRNAs control (si-Ctl) or targeting RHOB (si-RHOB1 and si-RHOB2) before treatment with 2  $\mu$ M PLX4032 for 72 h. Cells were analyzed for cell cycle by FACS and subG1 was quantified **A**, or labeled for TUNEL assay **B**, or lysed for Western blotting **C**.

Lu1205 (*BRAF*-mutant)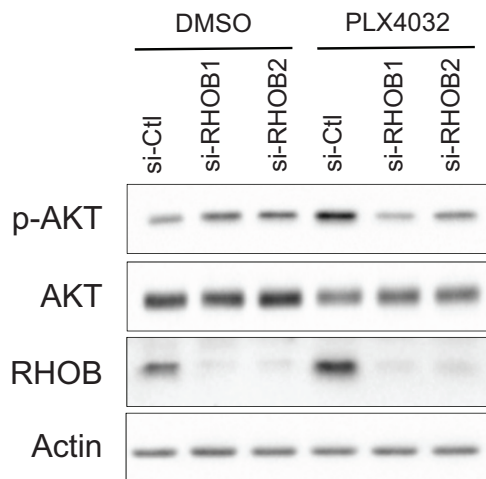RPMI-7951 (*BRAF*-mutant)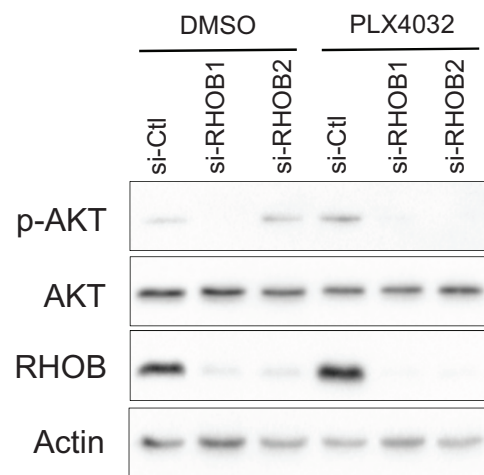WM239A (*BRAF*-mutant)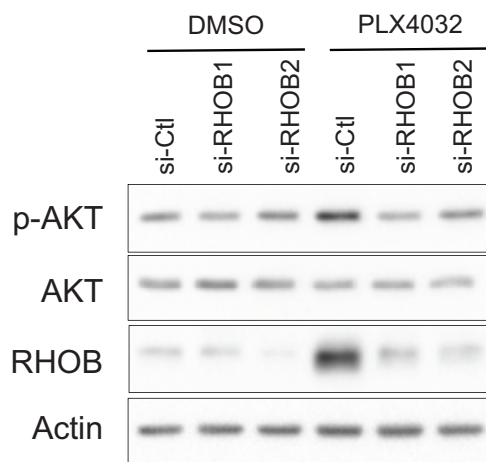WM1346 (*NRAS*-mutant)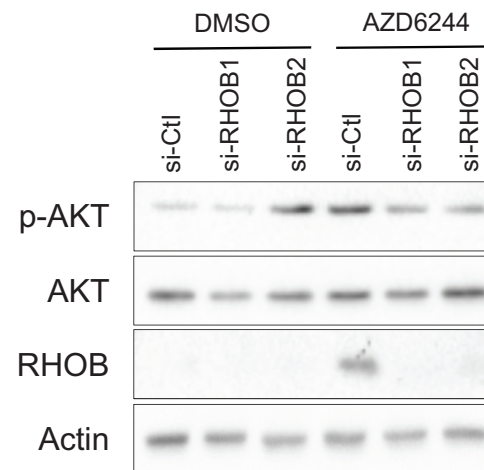

**Supplementary Figure S5: Expression of phosphorylated AKT upon RHOB knockdown with siRNA during a MAPK inhibitors treatment.** *BRAF*-mutant melanoma cell lines (Lu1205, RPMI-7951, WM239A) and *NRAS*-mutant melanoma cell lines (WM1346) were transfected with siRNA control (si-Ctl) or targeting RHOB (si-RHOB1 or si-RHOB2) before treatment with 1  $\mu$ M PLX4032 (*BRAF*-mutant cells) or AZD6244 (*NRAS*-mutant cells) for 48 h. AKT phosphorylation was analyzed by Western blotting. Total AKT and RHOB were examined in parallel. Actin was the loading control.

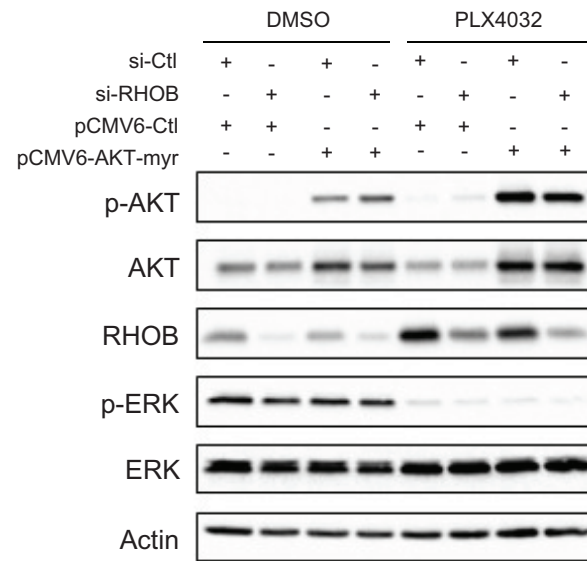

**Supplementary Figure S6: Expression and activation of AKT upon RHOB siRNA and AKT-myr transfection.** Western blotting analysis of the indicated proteins in WM266-4 cells co-transfected for 24 h with siRNAs control (si-Ctl) or targeting RHOB (si-RHOB2) together with an empty plasmid (pCMV6-Ctl) or a plasmid encoding AKT-myr (pCMV6-AKT-myr) before treatment with 2  $\mu$ M PLX4032 for 72 h.

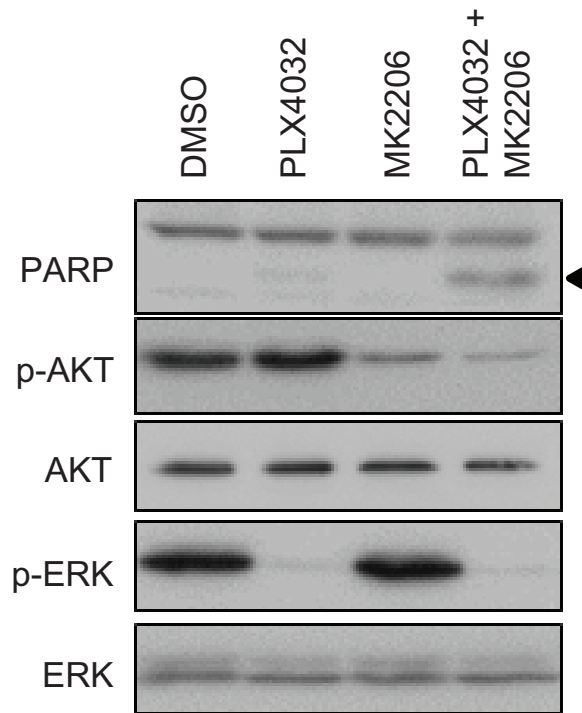

**Supplementary Figure S7: PLX4032/MK2206 combination potentiates PARP cleavage in WM266-4 cells.** Western blotting of indicated proteins in WM266-4 cells treated with 2  $\mu$ M PLX4032 and/or 1  $\mu$ M MK2206 (AKTi) for 48 h. The arrowhead at right indicates the cleaved fragment of PARP.

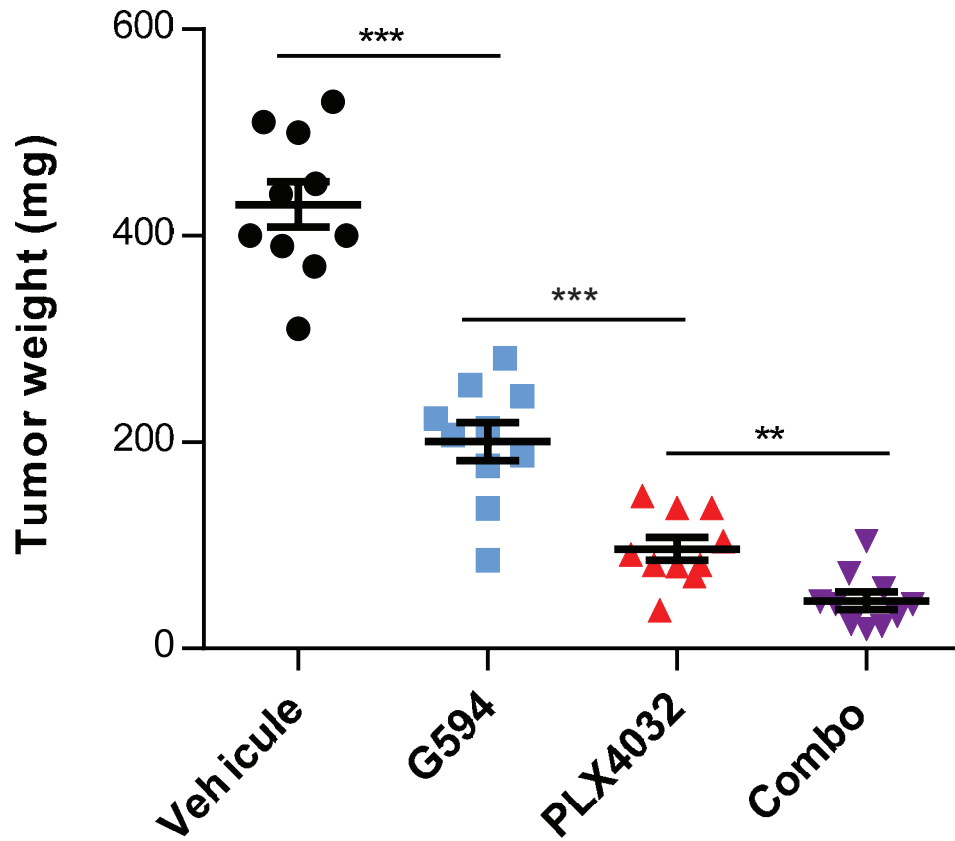

**Supplementary Figure S8: Tumor weight analysis in mice treated with AKT and/or BRAF<sup>V600E</sup> inhibitors.** Athymic mice were subcutaneously inoculated with  $1.5 \times 10^6$  WM266-4 cells and tumor allowed to grow for 10 days. Mice were randomized into groups (10 mice per group) and treated orally with vehicle, G594 or/and PLX4032 for 21 days. At the end of the experiment, tumors were harvested and weighted.



**Supplementary Table S1. Dose-response curve analysis with GraphPad software**

| Cell line | Drug    | siRNA  | logIC50             | IC50 ( $\mu$ M) | <i>p</i> -value compared to si-Ctl |
|-----------|---------|--------|---------------------|-----------------|------------------------------------|
| WM266-4   | PLX4032 | Ctl    | 0.053 $\pm$ 0.063   | 1.13            |                                    |
|           |         | RHOB1  | - 0.471 $\pm$ 0.056 | 0.338           | <0.0001                            |
|           |         | RHOB2  | - 0.551 $\pm$ 0.051 | 0.281           | <0.0001                            |
|           | AZD6244 | Ctl    | - 0.448 $\pm$ 0.053 | 0.357           |                                    |
|           |         | RHOB1  | - 0.842 $\pm$ 0.040 | 0.144           | <0.0001                            |
|           |         | RHOB2  | - 0.710 $\pm$ 0.064 | 0.195           | <0.005                             |
| A375      | PLX4032 | Ctl    | 0.475 $\pm$ 0.088   | 2.983           |                                    |
|           |         | RHOB1  | - 0.087 $\pm$ 0.064 | 0.819           | <0.0001                            |
|           |         | RHOB2  | - 0.055 $\pm$ 0.053 | 0.277           | <0.0001                            |
|           | AZD6244 | Ctl    | - 0.609 $\pm$ 0.132 | 0.246           |                                    |
|           |         | RHOB 1 | - 1.083 $\pm$ 0.055 | 0.083           | <0.005                             |
|           |         | RHOB 2 | - 0.945 $\pm$ 0.070 | 0.114           | <0.005                             |
| SK-MEL2   | AZD6244 | Ctl    | - 1.324 $\pm$ 0.044 | 0.047           |                                    |
|           |         | RHOB1  | - 1.886 $\pm$ 0.032 | 0.013           | <0.0001                            |
|           |         | RHOB2  | - 1.855 $\pm$ 0.045 | 0.014           | <0.0001                            |

**Supplementary Table S2. Dose-response curve analysis with GraphPad software**

| siRNA | logIC <sub>50</sub> | IC <sub>50</sub> (μM) | <i>p</i> -value compared to si-Ctl |
|-------|---------------------|-----------------------|------------------------------------|
| Ctl   | 0.827 ± 0.114       | 6.72                  | <0.0001                            |
| c-Jun | - 0.21 ± 0.031      | 0.610                 |                                    |

**Supplementary Table S3. Dose-response curve analysis with GraphPad software**

| siRNA | Adenovirus | logIC50            | IC50 ( $\mu$ M) | <i>p</i> -value compared to Ad-Ctl |
|-------|------------|--------------------|-----------------|------------------------------------|
| Ctl   | Ad-Ctl     | $-0.401 \pm 0.149$ | 0.40            | ns                                 |
| Ctl   | Ad-RHOB    | $-0.218 \pm 0.163$ | 0.61            |                                    |
| c-Jun | Ad-Ctl     | $-0.553 \pm 0.076$ | 0.28            | <0.001                             |
| c-Jun | Ad-RHOB    | $-0.113 \pm 0.087$ | 0.77            |                                    |

**Supplementary Table S4. Dose-response curve analysis with GraphPad software**

| siRNA | Plasmid       | logIC <sub>50</sub> | IC <sub>50</sub> (μM) | <i>p</i> -value compared to si-Ctl |
|-------|---------------|---------------------|-----------------------|------------------------------------|
| Ctl   | pCMV6-Ctl     | 0.174 ± 0.071       | 1.492                 | <0.0001                            |
| RHOB2 | pCMV6-Ctl     | - 0.468 ± 0.061     | 0.3407                |                                    |
| Ctl   | pCMV6-Akt-myr | 0.2818 ± 0.099      | 1.913                 | ns                                 |
| RHOB2 | pCMV6-Akt-myr | 0.340 ± 0.120       | 2.189                 |                                    |

**Supplementary Table S5. Patient's characteristics and RHOB staining analyzed by IHC**

| Patients ( <i>n</i> = 31)                          | Total           | RHOB pos. staining | RHOB neg. staining |
|----------------------------------------------------|-----------------|--------------------|--------------------|
| Age<br>(years ; median [IQR])                      | 63.5 [42; 72]   | 72 [58; 77]        | 62 [40; 70]        |
| Sex ratio (M/F)                                    | 1.46            | 0.6                | 2                  |
| AJCC 2009 staging IIIc, ( <i>n</i> =)              | 8               | 1                  | 7                  |
| IV M1a ( <i>n</i> =)                               | 0               | 0                  | 0                  |
| M1b ( <i>n</i> =)                                  | 19              | 5                  | 12                 |
| M1c ( <i>n</i> =)                                  | 7               | 2                  | 5                  |
| Progression-Free Survival<br>(days ; median [IQR]) | 217 [150 ; 285] | 135 [105 ; 141]    | 235 [214 ; 314]    |

Pos. : positive; neg. : negative; M/F : male/female; IQR : interquartile range

**Supplementary Table S6. Combination indexes and synergy analyzes on a panel of melanoma cell lines**

| Cells            | Mutations | Akt inhibitor | MAPK inhibitors | Ci/doses  |           | Synergy |
|------------------|-----------|---------------|-----------------|-----------|-----------|---------|
|                  |           |               |                 | 1 $\mu$ M | 3 $\mu$ M |         |
| <b>Lu1205</b>    | BRAF      | G-594         | PLX4032         | 0.64      | 0.58      | +       |
| <b>SK-MEL28</b>  | BRAF      | G-594         | PLX4032         | 0.37      | 0.5       | +       |
| <b>WM983B</b>    | BRAF      | G-594         | PLX4032         | 0.65      | 0.48      | +       |
| <b>WM239A</b>    | BRAF      | G-594         | PLX4032         | 0.21      | 0.16      | ++      |
| <b>A375</b>      | BRAF      | G-594         | PLX4032         | 0.38      | 0.55      | +       |
| <b>501Mel</b>    | BRAF      | G-594         | PLX4032         | 0.34      | 0.35      | +       |
| <b>RPMI-7951</b> | BRAF      | G-594         | PLX4032         | 0.39      | 0.56      | +       |
| <b>WM1346</b>    | NRAS      | G-594         | AZD6244         | 0.32      | 0.39      | +       |
| <b>SK-MEL2</b>   | NRAS      | G-594         | AZD6244         | 0.31      | 0.44      | +       |

Melanoma cell lines (2 *NRAS*-mutant or 7 *BRAF*-mutant) were treated with equal amount of AKT inhibitor (G594) and MAPK inhibitors (PLX4032 or AZD6244). Cell viability was measured 72 h later by MTS assay. Combination indexes (CI) were calculated with CompuSyn (strong synergism (++)  $0.1 < CI < 0.3$ ; synergism (+)  $0.3 < CI < 0.7$ ).

**Supplementary Table S7. Sequences of the primers used for RT-qPCR**

|          | Sequence / reference                                                                                                  | Provider          |
|----------|-----------------------------------------------------------------------------------------------------------------------|-------------------|
| si-Ctl   | SR-CL000-005                                                                                                          | Eurogentec        |
| si-RHOB1 | GGCAUUCUCUAAAGCUAUG-TT                                                                                                | Eurogentec        |
| si-RHOB2 | GCUAAGAUGGUGUUAUUUA-TT                                                                                                | Eurogentec        |
| si-c-Jun | SMARTpool<br>1 : UGGAAACGACCUUCUAUGA<br>2 : UAACGCAGCAGUUGCAAAC<br>3 : GAGCGGACCUUAUGGCUAC<br>4 : AAGUCAUGAACCACGUUAA | Thermo Scientific |

**Supplementary Table S8. Sequences of the siRNA**

| Gene      | Sequence                         | Reverse sequence                                 |
|-----------|----------------------------------|--------------------------------------------------|
| RHOA      | TGGAAGATGGCATAACCTGTC            | AACTGGTGGCTCCTCTGG                               |
| RHOB      | TTGTGCCTGTCCTAGAAGTG             | CAAGTGTGGTCAGAATGCTAC                            |
| RHOC      | TGTCATCCTCATGTGCTTCTC            | GTGCTCGTCTTGCTCAG                                |
| RHOD      | GATTGGAGCCTGTGACCTAC             | GTAATCCGCCGCCAGAAG                               |
| RHOE/RND3 | CCTGCTCCTCTCGCTCTC               | TCTGGCTGGCTCTTCTCTC                              |
| RHOF      | CAGACAGACCTCACGACAG              | GAGTTCAGAAATGTTCCAAGAG                           |
| RHOG      | CCGCTCTCACTTCCTTCTC              | ACCACCACGCACTTGATG                               |
| RHOH      | TTCACCTCCGAGACCTTCC              | GCCACAGAGTAGCACATCAG                             |
| RHOJ      | QuantiTect Primer Assay (Qiagen) |                                                  |
| RHOQ      | TATGCCAACGACGCCTTC               | GCCGTGTCATAGAGTCCTAG                             |
| RHOV      | CATAGCAAGTAGTAGGCAGGAG           | TCAGAGTGGGCAGTTAGAGG                             |
| RHOU      | CGGTGGTGTCTGTGGATG               | GAAGATGTCTGTGTTGGTGTAG                           |
| RND1      | GCAAGTGTTAGCGAAGGATTG            | GCAGAGTGGACGGACATTATC                            |
| RHON/RND2 | QuantiTect Primer Assay (Qiagen) |                                                  |
| CDC42     | GTCAAGTATGTGGAGTGTCTG            | CACCTGCGGCTCTTCTTC                               |
| RAC1      | AGAACACCGAGCACTGAAC              | ACGCATCTGAGAACTACATAGG<br>CCTATGTAGTTCTCAGATGCGT |
| RAC1b     | TACGGTAAGGATATAACCTCCC           | ACCTCAGGATACCATCTTTGC<br>GCAAAGATGGTATCCTGAGGT   |
| RAC2      | GGACAGCAAGCCAGTGAAC              | GGAGAAGCAGATGAGGAAGAC                            |
| RAC3      | GTGATGGTGGACGGGAAAC              | CACTTGGCACGAACATTCTC                             |
| Actin     | TCCCTGGAGAAGAGCTACGA             | AGGAAGGAAGGCTGGAAGAG                             |
